# Supplementary material for: Charge Storage and Reliability Characteristics of Nonvolatile Memory Capacitors with HfO2/Al2O3-Based Charge Trapping Layers
Source: MDPI journal article supplement (doi:10.3390/ma15186285), 2022-09-09
Supplement: s1 [file s1]

# Charge Storage and Reliability Characteristics of Nonvolatile Memory Capacitors with HfO<sub>2</sub>/Al<sub>2</sub>O<sub>3</sub>-Based Charge Trapping Layers

Dencho Spassov <sup>1</sup>, Albena Paskaleva <sup>1,\*</sup>, Elżbieta Guziewicz <sup>2</sup>, Wojciech Wozniak <sup>2</sup>, Todor Stanchev <sup>1</sup>, Tsvetan Ivanov <sup>1</sup>, Joanna Wojewoda-Budka <sup>3</sup> and Marta Janusz-Skuza <sup>3</sup>

<sup>1</sup> Institute of Solid State Physics, Bulgarian Academy of Sciences, Tzarigradsko Chaussee 72, 1784 Sofia, Bulgaria

<sup>2</sup> Institute of Physics, Polish Academy of Sciences, Al. Lotników 32/46, 02-668 Warsaw, Poland

<sup>3</sup> Institute of Metallurgy and Materials Science, Polish Academy of Sciences, ul. Reymonta 25, 30-059 Cracov, Poland

\* Correspondence: paskaleva@issp.bas.bg

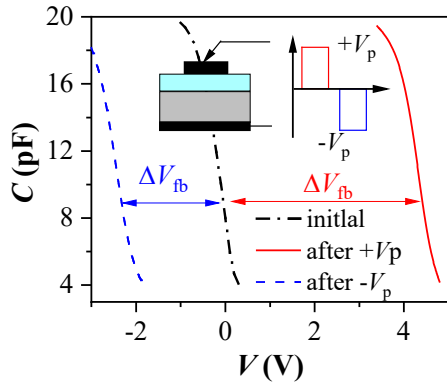

**Figure S1.** An illustration of the memory window definition. The memory window,  $\Delta V$  is defined as the difference in the position of the measured C-V curves (measured flat band capacitance  $C_{fb}$ ) after applying consecutively positive voltage pulse ( $+V_p$ ), under which negative charges are injected from Si and trapped in CTL, and negative voltage pulse ( $-V_p$ ), under which positive charges are injected and trapped in CTL. The inset shows the measurement procedure.
